# Supplementary material for: Bone Marrow-Derived Mesenchymal Stem Cell-Laden Nanocomposite Scaffolds Enhance Bone Regeneration in Rabbit Critical-Size Segmental Bone Defect Model
Source: MDPI journal article supplement (doi:10.3390/jfb15030066), 2024-03-10
Supplement: s1 [file s1]

## **Supplementary materials**

**Table S1:** Clinical observational parameters score.

| <b>Observational parameters</b> | <b>Score</b> |                                            |                                             |                                                                       |
|---------------------------------|--------------|--------------------------------------------|---------------------------------------------|-----------------------------------------------------------------------|
|                                 | <b>0</b>     | <b>1</b>                                   | <b>2</b>                                    | <b>3</b>                                                              |
| <b>Pain score</b>               | None         | Mild<br>(occasional vocalization)          | Moderate<br>(frequent vocalization)         | Severe<br>(vociferous vocalization, withdraws limb, bites, struggles) |
| <b>Swelling score</b>           | None         | Mild                                       | Obvious                                     | N/A*                                                                  |
| <b>Exudation score</b>          | None         | Mild<br>(single 2×2 gauze wipe sufficient) | Moderate<br>(two 2×2 gauze wipe sufficient) | Severe<br>(three or more 2×2 gauze wipe used)                         |

\*N/A: Not Applicable

**Table S2:** Lameness scoring.

| <b>Lameness score</b> | <b>Observations</b>                                                        |
|-----------------------|----------------------------------------------------------------------------|
| 0                     | No lameness observed                                                       |
| 1                     | Mild: Weight bearing lameness                                              |
| 2                     | Moderate: Weight bearing lameness with intermittent non-weight bearing     |
| 3                     | Severe: Non-weight bearing lameness with brief intermittent weight bearing |
| 4                     | Non-weight bearing lameness at all times                                   |

**Table S3:** Modified radiographic score by (Yang et al., 1994).

| Grading category                                   | Score |
|----------------------------------------------------|-------|
| <b>Periosteal reaction</b>                         |       |
| None                                               | 0     |
| Minimal (localized to the gaps)                    | 1     |
| Medium (extends over the gaps or towards ulna)     | 2     |
| Moderate (1/4 to 1/2 of the defect area)           | 3     |
| Full (1/2 to full length of defect)                | 4     |
| <b>Osteotomy line</b>                              |       |
| Both the osteotomy lines completely radiolucent    | 0     |
| One of the osteotomy lines partially radiolucent   | 1     |
| Both the osteotomy lines partially radiolucent     | 2     |
| One of the osteotomy lines invisible               | 3     |
| Both the osteotomy lines invisible                 | 4     |
| <b>Construct appearance (*not applicable)</b>      |       |
| Unchanged/intact                                   | 0     |
| Mild resorption (one localized area)               | 1     |
| Moderate resorption (more than one localized area) | 2     |
| Mostly replaced                                    | 3     |
| Fully replaced                                     | 4     |
| <b>Defect filling score</b>                        |       |
| No change in critical sized defect                 | 0     |
| 1-25% CSD filled with bony/cartilaginous tissue    | 1     |
| 25-50% CSD filled with bony/cartilaginous tissue   | 2     |
| 50-75% CSD filled with bony/cartilaginous tissue   | 3     |
| 75-100% CSD                                        | 4     |

\*The experiment scaffold was radiolucent in skiagram. Hence evaluation of construct appearance was not applicable.

**Table S4:** Modified Lane and Sandhu (1987) and Heiple et al. (1987) histopathological scoring system.

| Sl. No                                  | Feature                                     | Score |
|-----------------------------------------|---------------------------------------------|-------|
| <b>Histopathological scoring system</b> |                                             |       |
| <b>A</b>                                | <b>Osteogenesis</b>                         |       |
| 1                                       | No osteogenesis                             | 0     |
| 2                                       | Weak osteogenesis                           | 1     |
| 3                                       | Medium osteogenesis                         | 2     |
| 4                                       | Good osteogenesis                           | 3     |
| 5                                       | Perfect osteogenesis                        | 4     |
| <b>B</b>                                | <b>Union</b>                                |       |
| 1                                       | No evidence of union                        | 0     |
| 2                                       | Fibrous union                               | 1     |
| 3                                       | Osteochondral union                         | 2     |
| 4                                       | Bony union                                  | 3     |
| 5                                       | Complete organization of graft              | 4     |
| <b>C</b>                                | <b>Marrow</b>                               |       |
| 1                                       | None in the resected area                   | 0     |
| 2                                       | Beginning to appear                         | 1     |
| 3                                       | Present in greater than 1 /2 defect         | 2     |
| 4                                       | Complete colonization by red marrow         | 3     |
| 5                                       | Mature fatty marrow                         | 4     |
| <b>D</b>                                | <b>Cancellous bone/medullary bone</b>       |       |
| 1                                       | No osseous cellular activity                | 0     |
| 2                                       | Early apposition of new bone                | 1     |
| 3                                       | Active apposition of new bone               | 2     |
| 4                                       | Reorganizing cancellous bone                | 3     |
| 5                                       | Complete re-organization of cancellous bone | 4     |
| <b>E</b>                                | <b>Cortical/compact bone</b>                |       |
| 1                                       | None                                        | 0     |
| 2                                       | Early appearance                            | 1     |
| 3                                       | Formation underway                          | 2     |
| 4                                       | Mostly re-organized                         | 3     |
| 5                                       | Completely formed                           | 4     |

**Table S5:** The mean±SD of heart rate of various treatment groups at different time intervals.

| Group | Time interval in days     |                           |                           |                           |                           |                           |                           |                           |
|-------|---------------------------|---------------------------|---------------------------|---------------------------|---------------------------|---------------------------|---------------------------|---------------------------|
|       | Pre                       | Day 1                     | Day 2                     | Day 3                     | Day 4                     | Day 5                     | Day 6                     | Day 7                     |
| A     | 247.5±14.82 <sup>a</sup>  | 250±48.76 <sup>a</sup>    | 246.83±10.36 <sup>a</sup> | 250±22.52 <sup>a</sup>    | 258±25.95 <sup>a</sup>    | 229.67±21.74 <sup>a</sup> | 245±20.93 <sup>a</sup>    | 246.5±23.71 <sup>a</sup>  |
| B     | 248.83±28.27 <sup>a</sup> | 258.5±20.7 <sup>a</sup>   | 249.17±13.79 <sup>a</sup> | 247.67±46.37 <sup>a</sup> | 243.33±9.97 <sup>a</sup>  | 256.67±27.62 <sup>a</sup> | 256.83±21.14 <sup>a</sup> | 235.83±34.16 <sup>a</sup> |
| C     | 248.83±21.89              | 259.17±24.55 <sup>a</sup> | 258.33±21.63 <sup>a</sup> | 240.83±24.24 <sup>a</sup> | 268.67±24.8 <sup>a</sup>  | 247±24.66 <sup>a</sup>    | 236.67±30.71 <sup>a</sup> | 245.83±21.4 <sup>a</sup>  |
| D     | 248.67±36.06 <sup>a</sup> | 244.5±23.26 <sup>a</sup>  | 260.67±27.22 <sup>a</sup> | 247±20.75 <sup>a</sup>    | 248.33±36.81 <sup>a</sup> | 251±22.2 <sup>a</sup>     | 250.67±34.62 <sup>a</sup> | 243.67±23.28 <sup>a</sup> |
| E     | 240.67±16.44 <sup>a</sup> | 241.17±16.47 <sup>a</sup> | 236.5±16.57 <sup>a</sup>  | 231.83±21.66 <sup>a</sup> | 223.67±35.83 <sup>a</sup> | 245.83±20.02 <sup>a</sup> | 252±24.27 <sup>a</sup>    | 249.33±21.37 <sup>a</sup> |
| F     | 252.83±25.66 <sup>a</sup> | 248.83±21.79 <sup>a</sup> | 233±23.17 <sup>a</sup>    | 234.83±41.94 <sup>a</sup> | 253.33±19.91 <sup>a</sup> | 247.17±21.08 <sup>a</sup> | 226.17±22.97 <sup>a</sup> | 247.83±22.64 <sup>a</sup> |

The different alphabet and \* in superscripts represents significant between groups and within group comparison at different time intervals respectively. Different alphabets means  $p < 0.05$ , “\*” means  $p < 0.05$ , “\*\*\*” means  $p < 0.01$ .

**Table S6:** The mean±SD of respiratory rate of various treatment groups at different time intervals.

| Group | Time interval in days   |                         |                          |                         |                          |                         |                          |                          |
|-------|-------------------------|-------------------------|--------------------------|-------------------------|--------------------------|-------------------------|--------------------------|--------------------------|
|       | Pre                     | Day 1                   | Day 2                    | Day 3                   | Day 4                    | Day 5                   | Day 6                    | Day 7                    |
| A     | 50.83±7.6 <sup>a</sup>  | 53.33±6.86 <sup>a</sup> | 48.5±13.14 <sup>a</sup>  | 48±11.4 <sup>a</sup>    | 46.67±11.33 <sup>a</sup> | 48.5±11.84 <sup>a</sup> | 48.67±7.47 <sup>a</sup>  | 55.33±10.56 <sup>a</sup> |
| B     | 58±10.35 <sup>a</sup>   | 49.5±11.15 <sup>a</sup> | 50±9.38 <sup>a</sup>     | 53.17±7.63 <sup>a</sup> | 53.17±9.91 <sup>a</sup>  | 43.67±6.89 <sup>a</sup> | 47.17±13.45 <sup>a</sup> | 48.5±5.96                |
| C     | 49.83±9.68 <sup>a</sup> | 51.5±11.84 <sup>a</sup> | 52.33±7.58 <sup>a</sup>  | 49.5±9.57 <sup>a</sup>  | 47.33±8.12 <sup>a</sup>  | 45.5±9.54 <sup>a</sup>  | 47±10.14                 | 46±6.99 <sup>a</sup>     |
| D     | 50.17±8.42 <sup>a</sup> | 53±8.34 <sup>a</sup>    | 47.5±15.42 <sup>a</sup>  | 52.17±7.96 <sup>a</sup> | 51.17±9.2 <sup>a</sup>   | 46±10.24 <sup>a</sup>   | 53.67±7.47 <sup>a</sup>  | 49.5±10.33 <sup>a</sup>  |
| E     | 55±9.36 <sup>a</sup>    | 55.17±10.4 <sup>a</sup> | 53.17±12.3 <sup>a</sup>  | 50.33±9.18 <sup>a</sup> | 52.5±7.01 <sup>a</sup>   | 51.5±11.43 <sup>a</sup> | 55.33±7.63 <sup>a</sup>  | 49.83±6.55 <sup>a</sup>  |
| F     | 47.33±8.04 <sup>a</sup> | 51±6.69 <sup>a</sup>    | 54.67±10.82 <sup>a</sup> | 43±10.75 <sup>a</sup>   | 51±9.34 <sup>a</sup>     | 53.67±13.6 <sup>a</sup> | 45.67±11.99 <sup>a</sup> | 44.5±10.37 <sup>a</sup>  |

The different alphabet and \* in superscripts represents significant between groups and within group comparison at different time intervals respectively. Different alphabets means  $p < 0.05$ , “\*” means  $p < 0.05$ , “\*\*\*” means  $p < 0.01$ .

**Table S7:** The mean±SD of rectal temperature of various treatment groups at different time intervals.

| Group | Time interval in days    |                          |                          |                          |                          |                          |                          |                          |
|-------|--------------------------|--------------------------|--------------------------|--------------------------|--------------------------|--------------------------|--------------------------|--------------------------|
|       | Pre                      | Day 1                    | Day 2                    | Day 3                    | Day 4                    | Day 5                    | Day 6                    | Day 7                    |
| A     | 101.77±0.66 <sup>a</sup> | 101.48±0.5 <sup>a</sup>  | 101.82±0.62 <sup>a</sup> | 101.85±0.58 <sup>a</sup> | 102±0.76 <sup>a</sup>    | 101.93±0.84 <sup>a</sup> | 86.58±37.39 <sup>a</sup> | 101.7±0.75 <sup>a</sup>  |
| B     | 101.18±0.9 <sup>a</sup>  | 101.63±0.39 <sup>a</sup> | 101.28±0.84 <sup>a</sup> | 101.35±0.82 <sup>a</sup> | 101.22±0.79 <sup>a</sup> | 101.22±0.79 <sup>a</sup> | 101.33±0.65 <sup>a</sup> | 100.98±0.78 <sup>a</sup> |
| C     | 101.5±0.76 <sup>a</sup>  | 101.07±0.31 <sup>a</sup> | 101.65±0.72 <sup>a</sup> | 101.68±0.83 <sup>a</sup> | 101.62±0.78 <sup>a</sup> | 101.62±0.78 <sup>a</sup> | 101.57±0.74 <sup>a</sup> | 101.68±0.85 <sup>a</sup> |
| D     | 100.92±1.01 <sup>a</sup> | 101.8±0.85 <sup>a</sup>  | 101.47±0.77 <sup>a</sup> | 101.62±0.73 <sup>a</sup> | 101.25±0.71 <sup>a</sup> | 101.25±0.71 <sup>a</sup> | 101.27±0.44 <sup>a</sup> | 101.52±0.61 <sup>a</sup> |
| E     | 101.38±1.29 <sup>a</sup> | 100.87±1.01 <sup>a</sup> | 101.58±0.75 <sup>a</sup> | 101.43±0.94 <sup>a</sup> | 101.53±0.98 <sup>a</sup> | 101.53±0.98 <sup>a</sup> | 101.45±0.98 <sup>a</sup> | 101.47±0.82 <sup>a</sup> |
| F     | 101.32±0.64 <sup>a</sup> | 101.07±0.85 <sup>a</sup> | 101.8±0.54 <sup>a</sup>  | 101.52±0.6 <sup>a</sup>  | 101.47±0.61 <sup>a</sup> | 101.47±0.61 <sup>a</sup> | 101.53±0.67 <sup>a</sup> | 101.6±0.49 <sup>a</sup>  |

The different alphabet and \* in superscripts represents significant between groups and within group comparison at different time intervals respectively. Different alphabets means  $p < 0.05$ , “\*” means  $p < 0.05$ , “\*\*\*” means  $p < 0.01$ .

**Table S8:** The mean±SD of pain score of various treatment groups at different time intervals.

| Group | Time interval in days |                  |                  |                  |                        |                        |                         |                        |                        |                        |                         |                        |                         |           |
|-------|-----------------------|------------------|------------------|------------------|------------------------|------------------------|-------------------------|------------------------|------------------------|------------------------|-------------------------|------------------------|-------------------------|-----------|
|       | Pre                   | Day 1            | Day 2            | Day 3            | Day 4                  | Day 5                  | Day 6                   | Day 7                  | Day 8                  | Day 9                  | Day 10                  | Day 30                 | Day 60                  | Day 90    |
| A     | 0±0                   | 3±0 <sup>*</sup> | 3±0 <sup>*</sup> | 3±0 <sup>*</sup> | 3±0 <sup>*</sup>       | 3±0 <sup>*</sup>       | 2.83±0.41 <sup>a*</sup> | 2.5±0.55 <sup>*</sup>  | 2.5±0.55 <sup>*</sup>  | 2.33±0.52 <sup>*</sup> | 2.33±0.52 <sup>a*</sup> | 0.83±0.41 <sup>*</sup> | 0.5±0.55 <sup>a</sup>   | 0.33±0.52 |
| B     | 0±0                   | 3±0 <sup>*</sup> | 3±0 <sup>*</sup> | 3±0 <sup>*</sup> | 2.83±0.41 <sup>*</sup> | 3±0 <sup>*</sup>       | 2±0 <sup>b*</sup>       | 2±0 <sup>*</sup>       | 2±0 <sup>*</sup>       | 2±0 <sup>*</sup>       | 2.17±0.41 <sup>b*</sup> | 0±0                    | 0±0 <sup>b</sup>        | 0±0       |
| C     | 0±0                   | 3±0 <sup>*</sup> | 3±0 <sup>*</sup> | 3±0 <sup>*</sup> | 2.83±0.41 <sup>*</sup> | 3±0 <sup>*</sup>       | 2.17±0.41 <sup>b*</sup> | 2.17±0.41 <sup>*</sup> | 2.17±0.41 <sup>*</sup> | 2.17±0.41 <sup>*</sup> | 2.17±0.41 <sup>b*</sup> | 0±0                    | 0±0 <sup>b</sup>        | 0±0       |
| D     | 0±0                   | 3±0 <sup>*</sup> | 3±0 <sup>*</sup> | 3±0 <sup>*</sup> | 2.83±0.41 <sup>*</sup> | 3±0 <sup>*</sup>       | 2.17±0.41 <sup>b*</sup> | 2.33±0.52 <sup>*</sup> | 2±0 <sup>*</sup>       | 2.33±0.52 <sup>*</sup> | 2.33±0.52 <sup>b*</sup> | 0±0                    | 0.17±0.41 <sup>ab</sup> | 0±0       |
| E     | 0±0                   | 3±0 <sup>*</sup> | 3±0 <sup>*</sup> | 3±0 <sup>*</sup> | 2.83±0.41 <sup>*</sup> | 2.83±0.41 <sup>*</sup> | 2±0 <sup>b*</sup>       | 2.17±0.41 <sup>*</sup> | 2±0 <sup>*</sup>       | 2±0 <sup>*</sup>       | 2.33±0.52 <sup>a*</sup> | 0.33±0.52              | 0.33±0.52 <sup>ab</sup> | 0±0       |
| F     | 0±0                   | 3±0 <sup>*</sup> | 3±0 <sup>*</sup> | 3±0 <sup>*</sup> | 2.83±0.41 <sup>*</sup> | 3±0 <sup>*</sup>       | 2±0 <sup>b*</sup>       | 2.17±0.41 <sup>*</sup> | 2±0 <sup>*</sup>       | 2.17±0.41 <sup>*</sup> | 2.17±0.41 <sup>a*</sup> | 0.33±0.52              | 0.5±0.55 <sup>ab</sup>  | 0±0       |

The different alphabet and \* in superscripts represents significant between groups and within group comparison at different time intervals respectively. Different alphabets means  $p < 0.05$ , “\*” means  $p < 0.05$ , “\*\*\*” means  $p < 0.01$ .

**Table S9:** The mean±SD of swelling score of various treatment groups at different time intervals.

| Group | Time interval in days |                        |                        |                        |                        |                        |           |           |           |           |        |        |        |        |
|-------|-----------------------|------------------------|------------------------|------------------------|------------------------|------------------------|-----------|-----------|-----------|-----------|--------|--------|--------|--------|
|       | Pre                   | Day 1                  | Day 2                  | Day 3                  | Day 4                  | Day 5                  | Day 6     | Day 7     | Day 8     | Day 9     | Day 10 | Day 30 | Day 60 | Day 90 |
| A     | 0±0                   | 1.67±0.52 <sup>*</sup> | 1.5±0.55 <sup>*</sup>  | 1.33±0.52 <sup>*</sup> | 1.33±0.52 <sup>*</sup> | 1±0 <sup>*</sup>       | 0.5±0.55  | 0.33±0.52 | 0.33±0.52 | 0.17±0.41 | 0±0    | 0±0    | 0±0    | 0±0    |
| B     | 0±0                   | 1.17±0.41 <sup>*</sup> | 1.33±0.52 <sup>*</sup> | 1.17±0.41 <sup>*</sup> | 1.33±0.52 <sup>*</sup> | 0.83±0.41 <sup>*</sup> | 0.33±0.52 | 0.17±0.41 | 0±0       | 0±0       | 0±0    | 0±0    | 0±0    | 0±0    |
| C     | 0±0                   | 1.33±0.52 <sup>*</sup> | 1.17±0.41 <sup>*</sup> | 1±0 <sup>*</sup>       | 1±0 <sup>*</sup>       | 1±0 <sup>*</sup>       | 0±0       | 0±0       | 0±0       | 0±0       | 0±0    | 0±0    | 0±0    | 0±0    |
| D     | 0±0                   | 1.33±0.52 <sup>*</sup> | 1.17±0.41 <sup>*</sup> | 1.33±0.52 <sup>*</sup> | 1.33±0.52 <sup>*</sup> | 1.17±0.41 <sup>*</sup> | 0±0       | 0.17±0.41 | 0±0       | 0±0       | 0±0    | 0±0    | 0±0    | 0±0    |
| E     | 0±0                   | 1.33±0.52 <sup>*</sup> | 1.67±0.52 <sup>*</sup> | 1±0 <sup>*</sup>       | 1±0 <sup>*</sup>       | 1±0 <sup>*</sup>       | 0±0       | 0±0       | 0±0       | 0±0       | 0±0    | 0±0    | 0±0    | 0±0    |
| F     | 0±0                   | 1.33±0.52 <sup>*</sup> | 1.33±0.52 <sup>*</sup> | 1±0 <sup>*</sup>       | 1±0 <sup>*</sup>       | 1±0 <sup>*</sup>       | 0±0       | 0±0       | 0±0       | 0±0       | 0±0    | 0±0    | 0±0    | 0±0    |

The different alphabet and \* in superscripts represents significant between groups and within group comparison at different time intervals respectively. Different alphabets means  $p < 0.05$ , “\*” means  $p < 0.05$ , “\*\*\*” means  $p < 0.01$ .

**Table S10:** The mean±SD of exudation score of various treatment groups at different time intervals.

| Group | Time interval in days |                        |                          |                          |                          |                        |                          |           |           |           |           |        |        |        |
|-------|-----------------------|------------------------|--------------------------|--------------------------|--------------------------|------------------------|--------------------------|-----------|-----------|-----------|-----------|--------|--------|--------|
|       | Pre                   | Day 1                  | Day 2                    | Day 3                    | Day 4                    | Day 5                  | Day 6                    | Day 7     | Day 8     | Day 9     | Day 10    | Day 30 | Day 60 | Day 90 |
| A     | 0±0                   | 2.17±0.75 <sup>*</sup> | 2.5±0.55 <sup>ab*</sup>  | 2.67±0.52 <sup>a*</sup>  | 2.17±0.41 <sup>a*</sup>  | 1.17±0.41 <sup>*</sup> | 0.83±0.41 <sup>a*</sup>  | 0.5±0.55  | 0.33±0.52 | 0.17±0.41 | 0±0       | 0±0    | 0±0    | 0±0    |
| B     | 0±0                   | 2±0.89 <sup>*</sup>    | 2.17±0.41 <sup>a*</sup>  | 1.83±0.98 <sup>ab*</sup> | 1.67±0.82 <sup>ab*</sup> | 1.33±0.52 <sup>*</sup> | 0.67±0.52 <sup>ab*</sup> | 0.17±0.41 | 0±0       | 0±0       | 0±0       | 0±0    | 0±0    | 0±0    |
| C     | 0±0                   | 1.83±0.75 <sup>*</sup> | 2.33±0.52 <sup>a*</sup>  | 1.83±0.98 <sup>ab*</sup> | 1.17±0.41 <sup>b*</sup>  | 1.17±0.41 <sup>*</sup> | 0.67±0.52 <sup>ab*</sup> | 0.17±0.41 | 0±0       | 0±0       | 0±0       | 0±0    | 0±0    | 0±0    |
| D     | 0±0                   | 1.67±0.82 <sup>*</sup> | 1.17±0.75 <sup>b*</sup>  | 1.17±0.75 <sup>b*</sup>  | 0.83±0.75 <sup>b</sup>   | 0.83±0.75              | 0.17±0.41 <sup>b</sup>   | 0.17±0.41 | 0±0       | 0±0       | 0±0       | 0±0    | 0±0    | 0±0    |
| E     | 0±0                   | 1.83±0.75 <sup>*</sup> | 1.67±0.82 <sup>ab*</sup> | 1.5±0.55 <sup>b*</sup>   | 1.17±0.41 <sup>b*</sup>  | 1.17±0.41 <sup>*</sup> | 0.17±0.41 <sup>b</sup>   | 0.17±0.41 | 0.17±0.41 | 0.17±0.41 | 0.17±0.41 | 0±0    | 0±0    | 0±0    |
| F     | 0±0                   | 1.83±0.75 <sup>*</sup> | 1.5±0.84 <sup>ab*</sup>  | 1.33±0.52 <sup>b*</sup>  | 1±0.63 <sup>b*</sup>     | 1±0.63 <sup>*</sup>    | 0.33±0.52 <sup>ab</sup>  | 0.33±0.52 | 0.17±0.41 | 0±0       | 0±0       | 0±0    | 0±0    | 0±0    |

The different alphabet and \* in superscripts represents significant between groups and within group comparison at different time intervals respectively. Different alphabets means  $p < 0.05$ , “\*” means  $p < 0.05$ , “\*\*\*” means  $p < 0.01$ .

**Table S11:** The mean±SD of lameness score of various treatment groups at different time intervals.

| Group | Time interval in days |       |            |            |                          |                          |                          |
|-------|-----------------------|-------|------------|------------|--------------------------|--------------------------|--------------------------|
|       | Pre                   | Day 1 | Day 15     | Day 30     | Day 45                   | Day 60                   | Day 90                   |
| A     | 0±0                   | 4±0*  | 4±0*       | 4±0*       | 3.83±0.41 <sup>a*</sup>  | 3.5±0.55 <sup>a*</sup>   | 2.5±0.55 <sup>a*</sup>   |
| B     | 0±0                   | 4±0*  | 3.67±0.52* | 3.67±0.52* | 3.5±0.55 <sup>ab*</sup>  | 2.83±0.41 <sup>b*</sup>  | 2±0.89 <sup>a*</sup>     |
| C     | 0±0                   | 4±0*  | 3.83±0.41* | 3.83±0.41* | 3.33±0.52 <sup>ab*</sup> | 2.5±0.55 <sup>b*</sup>   | 1.83±0.98 <sup>a*</sup>  |
| D     | 0±0                   | 4±0*  | 3.83±0.41* | 3.67±0.52* | 3.33±0.52 <sup>ab*</sup> | 2.17±0.75 <sup>bc*</sup> | 1.33±0.82 <sup>ab*</sup> |
| E     | 0±0                   | 4±0*  | 3.83±0.41* | 3.67±0.52* | 3.5±0.55 <sup>ab*</sup>  | 2.33±0.52 <sup>b*</sup>  | 1±0.89 <sup>ab</sup>     |
| F     | 0±0                   | 4±0*  | 3.83±0.41* | 3.67±0.52* | 3±0.63 <sup>b*</sup>     | 1.5±0.55 <sup>a*</sup>   | 0.5±0.55 <sup>b</sup>    |

The different alphabet and \* in superscripts represents significant between groups and within group comparison at different time intervals respectively. Different alphabets means  $p < 0.05$ , “\*” means  $p < 0.05$ , “\*\*\*” means  $p < 0.01$ .

**Table S12:** The mean±SD of left hind foot stride length (cm) of various treatment groups at different time intervals.

| Group | Time interval in days   |                         |                         |                         |                         |                         |                         |
|-------|-------------------------|-------------------------|-------------------------|-------------------------|-------------------------|-------------------------|-------------------------|
|       | Pre                     | Day 1                   | Day 15                  | Day 30                  | Day 45                  | Day 60                  | Day 90                  |
| A     | 31.83±1.17 <sup>a</sup> | 31.42±0.92 <sup>a</sup> | 30.33±1.21 <sup>a</sup> | 30.25±1.08 <sup>a</sup> | 30.25±1.25 <sup>a</sup> | 28.83±6.05 <sup>a</sup> | 31.25±0.88 <sup>a</sup> |
| B     | 31.33±1.37 <sup>a</sup> | 29.97±1.33 <sup>a</sup> | 28.42±5.92 <sup>a</sup> | 30.83±1.21 <sup>a</sup> | 29.58±1.56 <sup>a</sup> | 30.25±2.19 <sup>a</sup> | 31.67±3.39 <sup>a</sup> |
| C     | 32.17±0.52 <sup>a</sup> | 30.17±1.91 <sup>a</sup> | 31.5±1.26 <sup>a</sup>  | 31.25±0.99 <sup>a</sup> | 31±1.41 <sup>a</sup>    | 31.75±3.34 <sup>a</sup> | 31.67±0.41 <sup>a</sup> |
| D     | 30.83±1.81 <sup>a</sup> | 29.42±2.2 <sup>a</sup>  | 28.83±0.75 <sup>a</sup> | 28.92±1.2 <sup>a</sup>  | 29.25±2.36 <sup>a</sup> | 28.25±1.08 <sup>a</sup> | 28.83±2.04 <sup>a</sup> |
| E     | 30.92±1.86 <sup>a</sup> | 30.08±1.16 <sup>a</sup> | 29.33±1.99 <sup>a</sup> | 30.08±1.16 <sup>a</sup> | 29.83±1.17 <sup>a</sup> | 29.92±0.92 <sup>a</sup> | 30.42±1.11 <sup>a</sup> |
| F     | 32±0.71 <sup>a</sup>    | 30.17±0.82 <sup>a</sup> | 29.75±0.69 <sup>a</sup> | 29.5±1.9 <sup>a</sup>   | 30.25±1.08 <sup>a</sup> | 30.17±0.75 <sup>a</sup> | 30.17±0.98 <sup>a</sup> |

The different alphabet and \* in superscripts represents significant between groups and within group comparison at different time intervals respectively. Different alphabets means  $p < 0.05$ , “\*” means  $p < 0.05$ , “\*\*\*” means  $p < 0.01$ .

**Table S13:** The mean±SD of right hind foot stride length (cm) of various treatment groups at different time intervals.

| Group | Time interval in days   |                         |                         |                         |                         |                         |                         |
|-------|-------------------------|-------------------------|-------------------------|-------------------------|-------------------------|-------------------------|-------------------------|
|       | Pre                     | Day 1                   | Day 15                  | Day 30                  | Day 45                  | Day 60                  | Day 90                  |
| A     | 31.83±1.17 <sup>a</sup> | 30.42±0.8 <sup>a</sup>  | 30±1.26 <sup>a</sup>    | 30.58±0.92 <sup>a</sup> | 30.25±1.25 <sup>a</sup> | 27.5±6.72 <sup>a</sup>  | 30.58±0.92 <sup>a</sup> |
| B     | 30.83±1.33 <sup>a</sup> | 29.97±1.33 <sup>a</sup> | 27.75±5.77 <sup>a</sup> | 29.83±1.13 <sup>a</sup> | 29.83±1.72 <sup>a</sup> | 30±2 <sup>a</sup>       | 30.08±0.92 <sup>a</sup> |
| C     | 30.83±1.44 <sup>a</sup> | 29.42±1.28 <sup>a</sup> | 29.92±1.36 <sup>a</sup> | 29.33±1.03 <sup>a</sup> | 29.58±1.11 <sup>a</sup> | 31.92±3.41 <sup>a</sup> | 29.5±1.05 <sup>a</sup>  |
| D     | 29.08±2.65 <sup>a</sup> | 28.33±1.54 <sup>a</sup> | 28.75±1.6 <sup>a</sup>  | 28.42±1.5 <sup>a</sup>  | 29.83±1.72 <sup>a</sup> | 28.58±1.28 <sup>a</sup> | 28.5±1.52 <sup>a</sup>  |
| E     | 30±1.48 <sup>a</sup>    | 29.17±2.07 <sup>a</sup> | 28.58±2.11 <sup>a</sup> | 28.83±1.63 <sup>a</sup> | 29.42±1.63 <sup>a</sup> | 29±1.41 <sup>a</sup>    | 29±1.52 <sup>a</sup>    |
| F     | 31.25±1.33 <sup>a</sup> | 30.17±1.21 <sup>a</sup> | 30.08±1.16 <sup>a</sup> | 30.17±1.21 <sup>a</sup> | 30±1.26 <sup>a</sup>    | 30.08±1.02 <sup>a</sup> | 30.67±1.03 <sup>a</sup> |

The different alphabet and \* in superscripts represents significant between groups and within group comparison at different time intervals respectively. Different alphabets means  $p < 0.05$ , “\*” means  $p < 0.05$ , “\*\*\*” means  $p < 0.01$ .

**Table S14:** The mean±SD of left forefoot stride length (cm) of various treatment groups at different time intervals.

| Group | Time interval in days   |                         |                         |                         |                         |                         |                         |
|-------|-------------------------|-------------------------|-------------------------|-------------------------|-------------------------|-------------------------|-------------------------|
|       | Pre                     | Day 1                   | Day 15                  | Day 30                  | Day 45                  | Day 60                  | Day 90                  |
| A     | 30.67±1.21 <sup>a</sup> | 30.42±0.8 <sup>a</sup>  | 30.5±0.84 <sup>a</sup>  | 30.5±0.84 <sup>a</sup>  | 30.33±1.03 <sup>a</sup> | 30.33±1.03 <sup>a</sup> | 30.58±0.92 <sup>a</sup> |
| B     | 30.83±1.33 <sup>a</sup> | 29.75±1.17 <sup>b</sup> | 29.83±1.13 <sup>a</sup> | 29.83±1.13 <sup>a</sup> | 29.83±1.17 <sup>a</sup> | 29.83±0.98 <sup>a</sup> | 30.08±0.92 <sup>a</sup> |
| C     | 29.83±0.93 <sup>a</sup> | 29.42±1.28 <sup>a</sup> | 29.5±1.22 <sup>a</sup>  | 29.5±1.22 <sup>a</sup>  | 29.58±1.11 <sup>a</sup> | 29.5±1.05 <sup>a</sup>  | 29.5±1.05 <sup>a</sup>  |
| D     | 28.83±1.72 <sup>a</sup> | 28.33±1.54 <sup>a</sup> | 28.5±1.55 <sup>a</sup>  | 28.33±1.54 <sup>a</sup> | 28.33±1.37 <sup>a</sup> | 28.58±1.28 <sup>a</sup> | 28.75±1.54 <sup>a</sup> |
| E     | 29.08±1.88 <sup>a</sup> | 28.33±1.66 <sup>a</sup> | 28.67±1.25 <sup>a</sup> | 28.33±1.66 <sup>a</sup> | 28.33±1.4 <sup>a</sup>  | 28.42±1.11 <sup>a</sup> | 28.83±1.63 <sup>a</sup> |
| F     | 29.5±0.89 <sup>a</sup>  | 29.67±0.88 <sup>a</sup> | 29.58±0.8 <sup>a</sup>  | 29.67±0.88 <sup>a</sup> | 29.58±0.8 <sup>a</sup>  | 29.67±0.82 <sup>a</sup> | 30.17±0.98 <sup>a</sup> |

The different alphabet and \* in superscripts represents significant between groups and within group comparison at different time intervals respectively. Different alphabets means  $p < 0.05$ , “\*” means  $p < 0.05$ , “\*\*\*” means  $p < 0.01$ .

**Table S15:** The mean±SD of right fore foot stride length (cm) of various treatment groups at different time intervals.

| Group | Time interval in days   |                          |                         |                          |                          |                           |                            |
|-------|-------------------------|--------------------------|-------------------------|--------------------------|--------------------------|---------------------------|----------------------------|
|       | Pre                     | Day 1                    | Day 15                  | Day 30                   | Day 45                   | Day 60                    | Day 90                     |
| A     | 30.17±3.31 <sup>a</sup> | 30.17±3.5                | 25.92±3.31 <sup>*</sup> | 22±2.68 <sup>**</sup>    | 20.25±5.96 <sup>**</sup> | 22.83±3.37 <sup>***</sup> | 24±2.97 <sup>**</sup>      |
| B     | 30±1.26 <sup>a</sup>    | 29.25±2.72               | 25.67±4.23 <sup>*</sup> | 25.75±2.27 <sup>*</sup>  | 23.58±1.5 <sup>*</sup>   | 23.92±3.58 <sup>ab</sup>  | 26.92±1.96 <sup>ab**</sup> |
| C     | 30.17±1.57 <sup>a</sup> | 33.75±2.82 <sup>**</sup> | 27.67±2.4               | 25.42±1.11 <sup>*</sup>  | 24.08±2.25 <sup>**</sup> | 27.58±2.54 <sup>bc</sup>  | 29.33±1.03 <sup>b</sup>    |
| D     | 27.83±1.47 <sup>a</sup> | 30.25±2.4                | 24.17±2.8               | 24.08±2.97               | 23±1.92                  | 31.25±1.54 <sup>c</sup>   | 28.5±1.52 <sup>b</sup>     |
| E     | 28.33±1.37 <sup>a</sup> | 31.25±2.32 <sup>*</sup>  | 23.92±2.71 <sup>*</sup> | 23.75±1.97 <sup>*</sup>  | 23.5±2.05                | 24.83±1.29 <sup>ab</sup>  | 28.33±0.98 <sup>b</sup>    |
| F     | 29.5±0.89 <sup>a</sup>  | 32±2.3                   | 24±2.47 <sup>**</sup>   | 23.92±1.91 <sup>**</sup> | 23.17±1.51 <sup>**</sup> | 26.17±1.94 <sup>ab</sup>  | 30.17±0.98 <sup>b</sup>    |

The different alphabet and \* in superscripts represents significant between groups and within group comparison at different time intervals respectively. Different alphabets means  $p < 0.05$ , “\*” means  $p < 0.05$ , “\*\*\*” means  $p < 0.01$ .

**Table S16:** The mean±SD of fore foot step length (cm) of various treatment groups at different time intervals.

| Group | Time interval in days  |                          |                          |                          |                          |                          |                         |
|-------|------------------------|--------------------------|--------------------------|--------------------------|--------------------------|--------------------------|-------------------------|
|       | Pre                    | Day 1                    | Day 15                   | Day 30                   | Day 45                   | Day 60                   | Day 90                  |
| A     | 9±1.41 <sup>a</sup>    | 4.86±1.75 <sup>a**</sup> | 4.29±1.11 <sup>a**</sup> | 4.43±1.17 <sup>a**</sup> | 4.21±1.52 <sup>a**</sup> | 5.21±1.63 <sup>a**</sup> | 6±1.12 <sup>a**</sup>   |
| B     | 8.42±0.92 <sup>a</sup> | 6.79±1.31 <sup>ab</sup>  | 6.83±1.63 <sup>b</sup>   | 7.57±1.94 <sup>b</sup>   | 7.67±1.89 <sup>b</sup>   | 7.92±1.66 <sup>b</sup>   | 7.08±1.36 <sup>ab</sup> |
| C     | 9.75±1.08 <sup>a</sup> | 7.17±0.88 <sup>b**</sup> | 7.29±1.42 <sup>b**</sup> | 7.33±0.93 <sup>b*</sup>  | 7.42±1.8 <sup>b*</sup>   | 8.67±1.78 <sup>b</sup>   | 8.42±0.8 <sup>bc</sup>  |
| D     | 8.25±1.13 <sup>a</sup> | 7.08±0.97 <sup>b</sup>   | 7.08±0.97 <sup>b</sup>   | 7.33±1.4 <sup>b</sup>    | 7.42±0.58 <sup>b</sup>   | 7.5±1.38 <sup>ab</sup>   | 8.17±1.29 <sup>bc</sup> |
| E     | 9.08±1.53 <sup>a</sup> | 7.83±1.13 <sup>b</sup>   | 8.17±0.93 <sup>b</sup>   | 7.5±1.05 <sup>b</sup>    | 8.83±1.57 <sup>b</sup>   | 8.75±1.21 <sup>b</sup>   | 9.42±1.11 <sup>c</sup>  |
| F     | 9.08±0.66 <sup>a</sup> | 7.92±0.86 <sup>b</sup>   | 8.08±0.38 <sup>b</sup>   | 7.92±0.58 <sup>b</sup>   | 7.75±0.42 <sup>b</sup>   | 8±0.71 <sup>b</sup>      | 8.25±0.82 <sup>bc</sup> |

The different alphabet and \* in superscripts represents significant between groups and within group comparison at different time intervals respectively. Different alphabets means  $p < 0.05$ , “\*” means  $p < 0.05$ , “\*\*\*” means  $p < 0.01$ .

**Table S17:** The mean±SD of drag mark length (cm) of various treatment groups at different time intervals.

| Group | Time interval in days |                           |                         |                       |                          |                          |                        |
|-------|-----------------------|---------------------------|-------------------------|-----------------------|--------------------------|--------------------------|------------------------|
|       | Pre                   | Day 1                     | Day 15                  | Day 30                | Day 45                   | Day 60                   | Day 90                 |
| A     | 0±0 <sup>a</sup>      | 22.92±2.85 <sup>a**</sup> | 3.5±1.38 <sup>a**</sup> | 3±0.95 <sup>a**</sup> | 2.25±1.86 <sup>a**</sup> | 1.33±1.54 <sup>a**</sup> | 0.33±0.82 <sup>a</sup> |
| B     | 0±0 <sup>a</sup>      | 9.17±7.93 <sup>b*</sup>   | 0±0 <sup>b</sup>        | 0±0 <sup>b</sup>      | 0±0 <sup>b</sup>         | 0±0 <sup>b</sup>         | 0±0 <sup>a</sup>       |
| C     | 0±0 <sup>a</sup>      | 5.92±7 <sup>b</sup>       | 1.58±3.88 <sup>b</sup>  | 0±0 <sup>b</sup>      | 0±0 <sup>b</sup>         | 0±0 <sup>b</sup>         | 0±0 <sup>a</sup>       |
| D     | 0±0 <sup>a</sup>      | 7.75±7.03 <sup>b</sup>    | 0±0 <sup>b</sup>        | 0±0 <sup>b</sup>      | 0±0 <sup>b</sup>         | 0±0 <sup>b</sup>         | 0±0 <sup>a</sup>       |
| E     | 0±0 <sup>a</sup>      | 4.67±5.27 <sup>b</sup>    | 0±0 <sup>b</sup>        | 0±0 <sup>b</sup>      | 0±0 <sup>b</sup>         | 0±0 <sup>b</sup>         | 0±0 <sup>a</sup>       |
| F     | 0±0 <sup>a</sup>      | 4.5±5.23 <sup>b</sup>     | 0±0 <sup>b</sup>        | 0±0 <sup>b</sup>      | 0±0 <sup>b</sup>         | 0±0 <sup>b</sup>         | 0±0 <sup>a</sup>       |

The different alphabet and \* in superscripts represents significant between groups and within group comparison at different time intervals respectively. Different alphabets means  $p < 0.05$ , “\*” means  $p < 0.05$ , “\*\*” means  $p < 0.01$ .

**Table S18:** The mean±SD of blood glucose (mg/dL) of various treatment groups at different time intervals.

| Group | Day 0       | Day 30      | Day 60      | Day 90      |
|-------|-------------|-------------|-------------|-------------|
| A     | 105.5±7.18  | 106±7.24    | 106±4.69    | 107.67±5.68 |
| B     | 106.83±7.41 | 107.5±5.82  | 105.5±2.26  | 105.67±3.39 |
| C     | 107.33±6.28 | 106.33±3.08 | 106.33±4.63 | 104.67±2.42 |
| D     | 106±6.23    | 106±4.69    | 109.5±6.02  | 106.17±5.42 |
| E     | 106.67±6.47 | 106.83±3.31 | 104±1.41    | 105.17±2.64 |
| F     | 108.83±6.97 | 105±2.83    | 105.67±4.5  | 105.33±6.44 |

The different alphabet and \* in superscripts represents significant between groups and within group comparison at different time intervals respectively. Different alphabets means  $p < 0.05$ , “\*” means  $p < 0.05$ , “\*\*” means  $p < 0.01$ .

**Table S19:** The mean±SD of serum total protein (g/dL) of various treatment groups at different time intervals.

| Group | Day 0     | Day 30    | Day 60                 | Day 90                 |
|-------|-----------|-----------|------------------------|------------------------|
| A     | 6.95±0.88 | 6.38±1.44 | 5.95±0.68 <sup>*</sup> | 5.64±0.69 <sup>*</sup> |
| B     | 6.91±0.88 | 6.44±0.74 | 5.97±0.32              | 6.01±0.63              |
| C     | 6.76±1.05 | 6.85±1.04 | 6.22±0.49              | 6.37±0.7               |
| D     | 6.12±0.71 | 7.35±1.34 | 6.22±0.78              | 6.07±0.97              |
| E     | 6.71±0.75 | 6.36±0.85 | 5.83±0.82              | 6.16±0.71              |
| F     | 6.36±0.63 | 6.82±0.58 | 6.21±0.74              | 6.48±0.72              |

The different alphabet and \* in superscripts represents significant between groups and within group comparison at different time intervals respectively. Different alphabets means  $p < 0.05$ , “\*” means  $p < 0.05$ , “\*\*” means  $p < 0.01$ .

**Table S20:** The mean±SD of serum alkaline phosphatase (IU/L) of various treatment groups at different time intervals.

| Group | Day 0                   | Day 30                    | Day 60                    | Day 90                    |
|-------|-------------------------|---------------------------|---------------------------|---------------------------|
| A     | 20.35±3.42 <sup>a</sup> | 27.43±3.76 <sup>a**</sup> | 34.24±5.24 <sup>a**</sup> | 31±3.16 <sup>a**</sup>    |
| B     | 19.99±2.36 <sup>a</sup> | 25.58±4.77 <sup>a*</sup>  | 34.56±4.02 <sup>a**</sup> | 32.56±3.35 <sup>a**</sup> |
| C     | 20.19±3.99 <sup>a</sup> | 30±4.58 <sup>ab**</sup>   | 37.28±9.05 <sup>a**</sup> | 30.82±7.45 <sup>a**</sup> |
| D     | 19.78±4.51 <sup>a</sup> | 35.17±3.97 <sup>b**</sup> | 59.73±5.28 <sup>b**</sup> | 53.29±7.45 <sup>b**</sup> |
| E     | 18.16±2.33 <sup>a</sup> | 28.47±4.75 <sup>a*</sup>  | 38.35±3.94 <sup>a**</sup> | 37.86±7.06 <sup>a**</sup> |
| F     | 19.58±2.88 <sup>a</sup> | 35.44±3.61 <sup>b**</sup> | 61.58±4.67 <sup>b**</sup> | 50.81±4.61 <sup>b**</sup> |

The different alphabet and \* in superscripts represents significant between groups and within group comparison at different time intervals respectively. Different alphabets means  $p < 0.05$ , “\*” means  $p < 0.05$ , “\*\*” means  $p < 0.01$ .

**Table S21:** The mean±SD of serum phosphorus (mg/dL) of various treatment groups at different time intervals.

| Group | Day 0                  | Day 30                    | Day 60                   | Day 90                   |
|-------|------------------------|---------------------------|--------------------------|--------------------------|
| A     | 4.79±0.36 <sup>a</sup> | 5.2±0.08 <sup>a*</sup>    | 5.11±0.14 <sup>a</sup>   | 4.74±0.16 <sup>a</sup>   |
| B     | 4.68±0.38 <sup>a</sup> | 5.53±0.14 <sup>b**</sup>  | 5.36±0.14 <sup>a**</sup> | 5.16±0.23 <sup>b</sup>   |
| C     | 4.56±0.29 <sup>a</sup> | 5.36±0.06 <sup>a**</sup>  | 5.42±0.28 <sup>a**</sup> | 5.2±0.18 <sup>b**</sup>  |
| D     | 4.57±0.37 <sup>a</sup> | 5.72±0.09 <sup>cd**</sup> | 6±0.09 <sup>bc**</sup>   | 5.67±0.14 <sup>c**</sup> |
| E     | 4.65±0.36 <sup>a</sup> | 5.62±0.11 <sup>bc**</sup> | 5.84±0.15 <sup>b**</sup> | 5.6±0.18 <sup>c**</sup>  |
| F     | 4.77±0.28 <sup>a</sup> | 5.89±0.10 <sup>d**</sup>  | 6.16±0.16 <sup>c**</sup> | 5.88±0.11 <sup>c**</sup> |

The different alphabet and \* in superscripts represents significant between groups and within group comparison at different time intervals respectively. Different alphabets means  $p < 0.05$ , “\*” means  $p < 0.05$ , “\*\*” means  $p < 0.01$ .

**Table S22:** The mean±SD of serum ionized calcium (mg/dL) of various treatment groups at different time intervals.

| Group | Day 0                  | Day 30                    | Day 60                   | Day 90                    |
|-------|------------------------|---------------------------|--------------------------|---------------------------|
| A     | 7.85±1.07 <sup>a</sup> | 6.67±0.75 <sup>a*</sup>   | 5.28±1.1 <sup>a**</sup>  | 4.86±0.75 <sup>a**</sup>  |
| B     | 6.81±1.78 <sup>a</sup> | 5.96±0.85 <sup>ac</sup>   | 5.05±0.6 <sup>a*</sup>   | 4.6±0.7 <sup>ab**</sup>   |
| C     | 7.27±1.36 <sup>a</sup> | 5.4±1.23 <sup>abc**</sup> | 5.42±0.66 <sup>a**</sup> | 4.28±0.58 <sup>ab**</sup> |
| D     | 7.01±1.16 <sup>a</sup> | 4.06±0.71 <sup>bc**</sup> | 2.75±1.04 <sup>b**</sup> | 3.39±1.35 <sup>bc**</sup> |
| E     | 7.53±0.62 <sup>a</sup> | 4.82±0.78 <sup>c**</sup>  | 2.78±0.7 <sup>b**</sup>  | 3.18±0.7 <sup>bc**</sup>  |
| F     | 7.13±1.34 <sup>a</sup> | 4.03±0.72 <sup>c**</sup>  | 1.7±0.67 <sup>b**</sup>  | 1.96±0.38 <sup>c**</sup>  |

The different alphabet and \* in superscripts represents significant between groups and within group comparison at different time intervals respectively. Different alphabets means  $p < 0.05$ , “\*” means  $p < 0.05$ , “\*\*” means  $p < 0.01$ .

**Table S23:** The mean±SD of roentgenogram periosteal reaction score of various treatment groups at different time intervals.

| Group | Day 0            | Day 30                   | Day 60                   | Day 90                  |
|-------|------------------|--------------------------|--------------------------|-------------------------|
| A     | 0±0 <sup>a</sup> | 0.33±0.52 <sup>a*</sup>  | 0.67±0.52 <sup>a*</sup>  | 0.83±0.41 <sup>a*</sup> |
| B     | 0±0 <sup>a</sup> | 0.67±0.52 <sup>ab*</sup> | 1.5±0.55 <sup>b*</sup>   | 2±0 <sup>b*</sup>       |
| C     | 0±0 <sup>a</sup> | 1±0 <sup>b*</sup>        | 1.83±0.41 <sup>b*</sup>  | 2.83±0.41 <sup>c*</sup> |
| D     | 0±0 <sup>a</sup> | 3±0 <sup>ce*</sup>       | 3.83±0.41 <sup>ce*</sup> | 4±0 <sup>df*</sup>      |
| E     | 0±0 <sup>a</sup> | 3±0 <sup>de*</sup>       | 4±0 <sup>de*</sup>       | 4±0 <sup>ef*</sup>      |
| F     | 0±0 <sup>a</sup> | 3±0 <sup>e*</sup>        | 4±0 <sup>e*</sup>        | 4±0 <sup>f*</sup>       |

The different alphabet and \* in superscripts represents significant between groups and within group comparison at different time intervals respectively. Different alphabets means  $p < 0.05$ , “\*” means  $p < 0.05$ , “\*\*\*” means  $p < 0.01$ .

**Table S24:** The mean±SD of osteotomy line score of various treatment groups at different time intervals.

| Group | Day 0            | Day 30                   | Day 60                  | Day 90                  |
|-------|------------------|--------------------------|-------------------------|-------------------------|
| A     | 0±0 <sup>a</sup> | 0.67±0.52 <sup>a*</sup>  | 2±0 <sup>a*</sup>       | 2.83±0.41 <sup>a*</sup> |
| B     | 0±0 <sup>a</sup> | 1±0 <sup>a*</sup>        | 2.67±0.52 <sup>b*</sup> | 2.83±0.41 <sup>a*</sup> |
| C     | 0±0 <sup>a</sup> | 2.67±0.52 <sup>bc*</sup> | 4±0 <sup>c*</sup>       | 4±0 <sup>b*</sup>       |
| D     | 0±0 <sup>a</sup> | 2.83±0.41 <sup>c*</sup>  | 4±0 <sup>c*</sup>       | 4±0 <sup>b*</sup>       |
| E     | 0±0 <sup>a</sup> | 3.5±0.55 <sup>d*</sup>   | 4±0 <sup>c*</sup>       | 4±0 <sup>b*</sup>       |
| F     | 0±0 <sup>a</sup> | 3.67±0.52 <sup>d*</sup>  | 4±0 <sup>c*</sup>       | 4±0 <sup>b*</sup>       |

The different alphabet and \* in superscripts represents significant between groups and within group comparison at different time intervals respectively. Different alphabets means  $p < 0.05$ , “\*” means  $p < 0.05$ , “\*\*\*” means  $p < 0.01$ .

**Table S25:** The mean±SD of critical size defect filling score of various treatment groups at different time intervals.

| Group | Day 0            | Day 30                  | Day 60                  | Day 90                  |
|-------|------------------|-------------------------|-------------------------|-------------------------|
| A     | 0±0 <sup>a</sup> | 0±0 <sup>a</sup>        | 0±0 <sup>a</sup>        | 0±0 <sup>a</sup>        |
| B     | 0±0 <sup>a</sup> | 1±0 <sup>b*</sup>       | 1±0 <sup>b*</sup>       | 1±0 <sup>b*</sup>       |
| C     | 0±0 <sup>a</sup> | 1±0 <sup>b*</sup>       | 1±0 <sup>b*</sup>       | 1.83±0.41 <sup>c*</sup> |
| D     | 0±0 <sup>a</sup> | 1.17±0.41 <sup>b*</sup> | 3±0 <sup>c*</sup>       | 3±0 <sup>d*</sup>       |
| E     | 0±0 <sup>a</sup> | 2±0 <sup>c*</sup>       | 2.83±0.41 <sup>c*</sup> | 4±0 <sup>e*</sup>       |
| F     | 0±0 <sup>a</sup> | 2.33±0.52 <sup>c*</sup> | 3.83±0.41 <sup>d*</sup> | 4±0 <sup>e*</sup>       |

The different alphabet and \* in superscripts represents significant between groups and within group comparison at different time intervals respectively. Different alphabets means  $p < 0.05$ , “\*” means  $p < 0.05$ , “\*\*\*” means  $p < 0.01$ .

**Table S26:** The mean±SD of microphotometric analysis of 90th day in different treatment groups.

| Group | Osteogenesis           | Union                  | Marrow                  | Cancellous bone        | Cortical bone           | Total HP score          |
|-------|------------------------|------------------------|-------------------------|------------------------|-------------------------|-------------------------|
| A     | 0±0 <sup>a</sup>       | 0.17±0.41 <sup>a</sup> | 0±0 <sup>a</sup>        | 0±0 <sup>a</sup>       | 0±0 <sup>e</sup>        | 0.17±0.41 <sup>a</sup>  |
| B     | 0.83±0.41 <sup>b</sup> | 1±0 <sup>b</sup>       | 0±0 <sup>a</sup>        | 0.83±0.41 <sup>b</sup> | 0±a <sup>a</sup>        | 2.67±0.82 <sup>b</sup>  |
| C     | 1.67±0.52 <sup>c</sup> | 1.17±0.41 <sup>b</sup> | 0±0 <sup>a</sup>        | 1.67±0.52 <sup>c</sup> | 0.33±0.52 <sup>ab</sup> | 4.83±0.75 <sup>c</sup>  |
| D     | 2±0 <sup>c</sup>       | 2.17±0.41 <sup>c</sup> | 0.33±0.52 <sup>ab</sup> | 2.83±0.41 <sup>d</sup> | 0.83±0.41 <sup>b</sup>  | 8.17±0.75 <sup>d</sup>  |
| E     | 3.17±0.41 <sup>d</sup> | 3.33±0.52 <sup>d</sup> | 1.17±0.75 <sup>b</sup>  | 3.83±0.41 <sup>e</sup> | 2.33±0.52 <sup>c</sup>  | 13.83±1.47 <sup>e</sup> |
| F     | 3.33±0.52 <sup>d</sup> | 3.5±0.55 <sup>d</sup>  | 2±0.89 <sup>b</sup>     | 3.83±0.41 <sup>e</sup> | 3.33±0.52 <sup>d</sup>  | 16±1.1 <sup>f</sup>     |

The different alphabet and \* in superscripts represents significant between groups and within group comparison at different time intervals respectively. Different alphabets means  $p < 0.05$ , “\*” means  $p < 0.05$ , “\*\*” means  $p < 0.01$ .
